# Supplementary material
Source: publisher figshare collection journal article supplement (https://frontiersin.figshare.com/ndownloader/files/29048706)
Supplement: Supplementary file [file 29048706]

Supplementary Information (SI)

Table S1. Individual, social and clinical characteristics of volunteers.

|                               |                                   | <b>MD</b>              | <b>CG1</b>             | <b>TRD</b>              | <b>CG2</b>             |
|-------------------------------|-----------------------------------|------------------------|------------------------|-------------------------|------------------------|
| <b>Sample (n)</b>             |                                   | 30                     | 32                     | 28                      | 30                     |
| <b>Gender</b>                 | Women                             | 16 (53.33%)            | 17 (53.12%)            | 21 (75%)                | 23 (76.67%)            |
|                               | Men                               | 14 (46.67%)            | 15 (46.88%)            | 7 (25%)                 | 7 (23.33%)             |
| <b>Age (years)</b>            |                                   | $\mu = 24.2 \pm 3.84$  | $\mu = 27.06 \pm 6.42$ | $\mu = 41.57 \pm 11.61$ | $\mu = 32.34 \pm 1.95$ |
| <b>Education</b>              | Undergraduate                     | 18 (60%)               | 17 (53.13%)            | 22 (78.57%)             | 12 (40%)               |
|                               | Graduate                          | 12 (40%)               | 15 (46.87%)            | 6 (21.43%)              | 18 (60%)               |
| <b>Familiar Income</b>        | Low                               | 23 (76.67%)            | 18 (56.25%)            | 23 (82.14%)             | 14 (46.67%)            |
|                               | Medium                            | 7 (23.33%)             | 14 (43.75%)            | 5 (17.86%)              | 16 (53.33%)            |
|                               | High                              | 0 (0%)                 | 0 (0%)                 | 0 (0%)                  | 0 (0%)                 |
| <b>Clinical Aspects</b>       | HAM-D                             | $\mu = 12.56 \pm 0.56$ | $\mu = 0.71 \pm 0.22$  | $\mu = 21.57 \pm 0.99$  | $\mu = 0.55 \pm 0.16$  |
|                               | Duration of disease               | 0                      | 0                      | $\mu = 10.71 \pm 1.83$  | 0                      |
|                               | Episodes                          | 0                      | 0                      | $\mu = 12.71 \pm 1.83$  | 0                      |
|                               | Personality disorders comorbidity | 0 (0%)                 | 0 (0%)                 | 20 (71.42%)             | 0 (0%)                 |
|                               | Anxiety comorbidity               | 1 (3.33%)              | 0 (0%)                 | 12 (42.86%)             | 0 (0%)                 |
| <b>BMI (kg/m<sup>2</sup>)</b> |                                   | $\mu = 25.65 \pm 5.42$ | $\mu = 23.98 \pm 4.78$ | $\mu = 27.62 \pm 1.07$  | $\mu = 23.43 \pm 0.71$ |
| <b>PSQI</b>                   |                                   | U = 369 p = 0.23       |                        | U = 211 p = 0.001       |                        |
|                               |                                   | $\mu = 9.90 \pm 0.63$  | $\mu = 5.65 \pm 0.52$  | $\mu = 14 \pm 0.70$     | $\mu = 4.96 \pm 0.43$  |
|                               |                                   | U = 164.5 p < 0.001    |                        | U = 8.5 p < 0.001       |                        |

MD: first episode depressive patient; CG1: control group 1; TRD: treatment-resistant depressive patients; CG2: control group 2; HAM-D: Hamilton depression scale; BMI: body mass index; PSQI: Pittsburgh Sleep Quality Index.
